# Supplementary material for: Cd(ii) coordination compounds as heterogeneous catalysts for microwave-assisted peroxidative oxidation of toluene and 1-phenylethanol
Source: Royal Society of Chemistry journal article supplement (doi:10.1039/d0nj01408g), 2020-01-01
Supplement: d0nj01408g1.pdf [file d0nj01408g1.pdf]

## Supplementary Material

for

### Cd(II) coordination compounds as heterogeneous catalysts for microwave-assisted peroxidative oxidation of toluene and 1- phenylethanol

Manas Sutradhar,<sup>\*a</sup> Tannistha Roy Barman,<sup>a</sup> Elisabete C.B.A. Alegria,<sup>a,b</sup> Hugo M. Lapa,<sup>a,b</sup>  
M. Fátima C. Guedes da Silva,<sup>a</sup> and Armando J. L. Pombeiro<sup>\*a</sup>

<sup>a</sup>Centro de Química Estrutural, Instituto Superior Técnico, Universidade de Lisboa, Av.  
Rovisco Pais, 1049-001 Lisboa, Portugal

<sup>b</sup>Área Departamental de Engenharia Química, Instituto Superior de Engenharia de Lisboa,  
Instituto Politécnico de Lisboa, R. Conselheiro Emídio Navarro, 1, 1959-007 Lisboa,  
Portugal

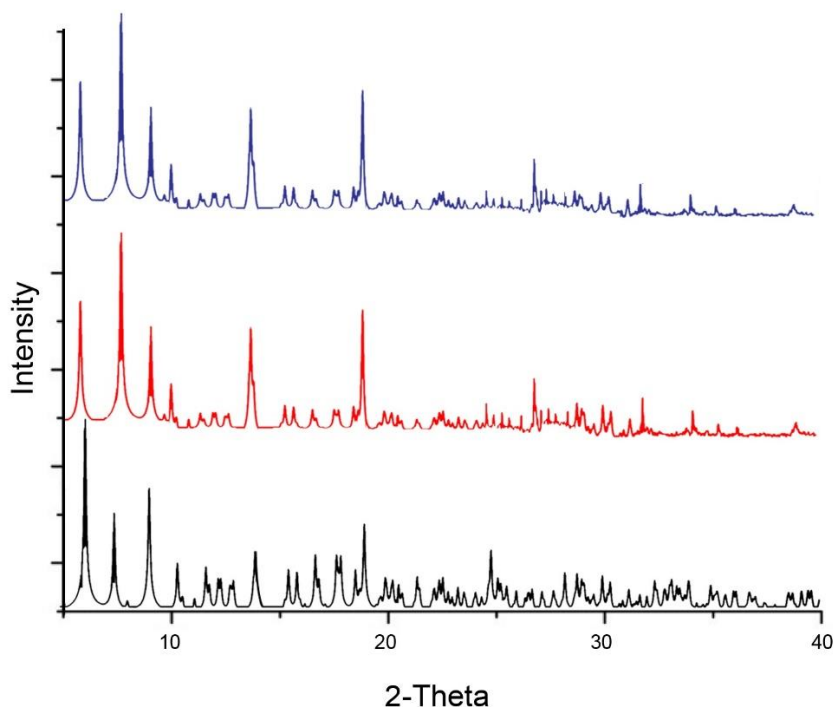

(a)

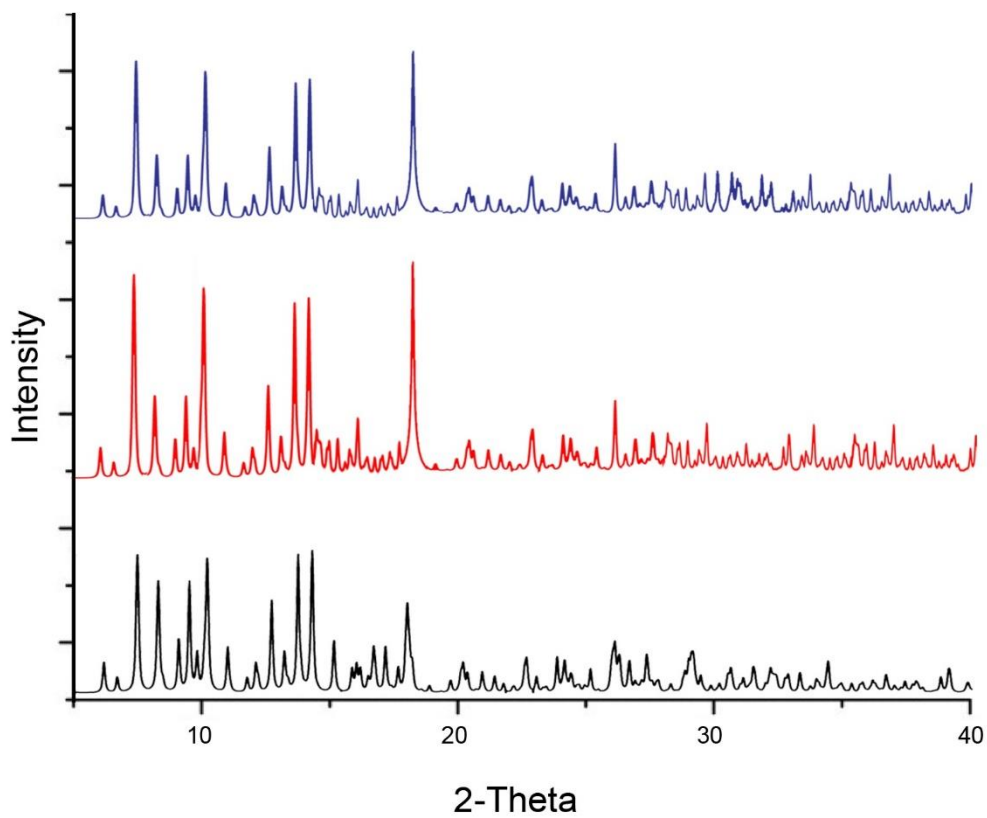

(b)

**Figure S1.** Powder XRD curves of (a) compound **1** and (a) compound **2**. The red and blue curves refer to before and after the catalysis reaction and the black curve is the theoretical one.
